# Supplementary material for: Impact of a Nutrient Formulation on Longitudinal Myelination, Cognition, and Behavior from Birth to 2 Years: A Randomized Clinical Trial
Source: MDPI journal article supplement (doi:10.3390/nu15204439), 2023-10-19
Supplement: s1 [file s1]

## ***Supplementary Material***

# **Impact of a Nutrient Formulation on Longitudinal Myelination, Cognition, and Behavior from Birth to 2 Years: A Randomized Clinical Trial**

**Nora Schneider<sup>1\*</sup>, Mickaël Hartweg<sup>2</sup>, Jonathan O'Regan<sup>3</sup>, Jennifer Beauchemin<sup>4</sup>, Leanne Redman<sup>5</sup>, Daniel S. Hsia<sup>5</sup>, Pascal Steiner<sup>1</sup>, Owen Carmichael<sup>5</sup>, Viren D'Sa<sup>4,6</sup>, Sean C. L. Deoni<sup>6,7</sup>**

<sup>1</sup>Brain Health, Nestlé Institute of Health Sciences, Nestlé Research, Société des Produits Nestlé SA, Lausanne, Switzerland

<sup>2</sup>Biostatistics and Data Management, Clinical Research Unit, Nestlé Research, Société des Produits Nestlé SA, Vers-chez-les-Blanc, Lausanne, Switzerland

<sup>3</sup>Nestlé Development Centre Nutrition, Askeaton, Co. Limerick, Ireland

<sup>4</sup>Advanced Baby Imaging Lab, Hasbro Children's Hospital, Providence, USA

<sup>5</sup>Pennington Biomedical Research Center, Baton Rouge, Louisiana, USA

<sup>6</sup>Department of Pediatrics, Brown University, Providence, USA

<sup>7</sup>Spinn Neuroscience, 98275 Mukilteo, WA

**\* Correspondence:** Nora Schneider: [nora.schneider@rdls.nestle.com](mailto:nora.schneider@rdls.nestle.com)

## Supplementary Figures and Tables

**Supplementary Table S1.** Summary of MRI acquisition protocols

| Sequence |           | Parameter                     | 3 & 6 Months                   | 12 & 18 Months                 | 24 Months                      |
|----------|-----------|-------------------------------|--------------------------------|--------------------------------|--------------------------------|
| mcDESPOT | SPGR      | FOV (cm <sup>2</sup> )        | 16 x 16                        | 19 x 19                        | 22 x 22                        |
|          |           | Matrix                        | 96 x 96                        | 112 x 112                      | 128 x 128                      |
|          |           | # Slices                      | 80                             | 84                             | 92                             |
|          |           | TE/TR (ms)                    | 5.8 / 14                       | 5.4 / 14                       | 5.4 / 14                       |
|          |           | Flip Angles                   | 2, 3, 4, 5, 6, 7, 10, 14       | 2, 3, 4, 5, 6, 7, 10, 14       | 2, 3, 4, 5, 6, 7, 10, 14       |
|          |           | Bandwidth                     | 350 Hz/Pixel                   | 350 Hz/Pixel                   | 350 Hz/Pixel                   |
|          | IR-SPGR   | FOV (cm <sup>2</sup> )        | 16 x 16                        | 19 x 19                        | 22 x 22                        |
|          |           | Matrix                        | 64 x 64                        | 64 x 64                        | 64 x 64                        |
|          |           | # Slices                      | 40                             | 42                             | 46                             |
|          |           | TE/TR (ms)                    | 5.8 / 14                       | 5.4 / 14                       | 5.3 / 14                       |
|          |           | TI (ms)                       | 950                            | 950                            | 950                            |
|          |           | Flip Angles                   | 5                              | 5                              | 5                              |
|          | Bandwidth | 350 Hz/Pixel                  | 350 Hz/Pixel                   | 350 Hz/Pixel                   |                                |
|          | bSSFP     | FOV (cm <sup>2</sup> )        | 16 x 16                        | 19 x 19                        | 22 x 22                        |
|          |           | Matrix                        | 96 x 96                        | 112 x 112                      | 128 x 128                      |
|          |           | # Slices                      | 80                             | 84                             | 92                             |
|          |           | TE/TR (ms)                    | 6 / 12                         | 6 / 12                         | 6 / 12                         |
|          |           | Flip Angles                   | 12, 16, 19, 23, 27, 35, 50, 70 | 12, 16, 19, 23, 27, 35, 50, 70 | 12, 16, 19, 23, 27, 35, 50, 70 |
|          |           | Bandwidth                     | 350 Hz/Pixel                   | 350 Hz/Pixel                   | 350 Hz/Pixel                   |
| MP-RAGE  |           | FOV (cm <sup>2</sup> )        | 16 x 16                        | 19 x 19                        | 22 x 22                        |
|          |           | Matrix                        | 64 x 64                        | 64 x 64                        | 64 x 64                        |
|          |           | # Slices                      | 40                             | 42                             | 46                             |
|          |           | TE/TR (ms)                    | 5.8 / 14                       | 5.4 / 14                       | 5.3 / 14                       |
|          |           | TI (ms)                       | 950                            | 950                            | 950                            |
|          |           | Flip Angle                    | 5                              | 5                              | 5                              |
|          |           | Bandwidth                     | 350 Hz/Pixel                   | 350 Hz/Pixel                   | 350 Hz/Pixel                   |
| DTI      |           | FOV (cm <sup>2</sup> )        | 16 x 16                        | 19 x 19                        | 22 x 22                        |
|          |           | Matrix                        | 64 x 64                        | 64 x 64                        | 64 x 64                        |
|          |           | # Slices                      | 48                             | 48                             | 48                             |
|          |           | Slice Thickness (mm)          | 2.5                            | 2.5                            | 2.5                            |
|          |           | Orientation                   | Axial                          | Axial                          | Axial                          |
|          |           | TE/TR (ms)                    | 104 / 6700                     | 104 / 6700                     | 104 / 6700                     |
|          |           | B-Values (s/mm <sup>2</sup> ) | 0, 700, 1500, 2000             | 0, 700, 1500, 2000             | 0, 700, 1500, 2000             |
|          |           | # Diffusion Directions        | 2 / 12 / 30 / 30               | 2 / 12 / 30 / 30               | 2 / 12 / 30 / 30               |
|          |           | Acceleration Factor           | 2                              | 2                              | 2                              |
| rsfMRI   |           | FOV (cm <sup>2</sup> )        | 16 x 16                        | 19 x 19                        | 22 x 22                        |
|          |           | Matrix                        | 64 x 64                        | 64 x 64                        | 64 x 64                        |

|  |                      |           |           |           |
|--|----------------------|-----------|-----------|-----------|
|  | # Slices             | 42        | 42        | 42        |
|  | Slice Thickness (mm) | 3.6       | 3.6       | 3.6       |
|  | Orientation          | Axial     | Axial     | Axial     |
|  | TE/TR (ms)           | 34 / 2500 | 34 / 2500 | 34 / 2500 |
|  | Flip Angle           | 80        | 80        | 80        |
|  | # Volumes            | 164       | 164       | 164       |
|  | Acceleration Factor  | 2         | 2         | 2         |

**Supplementary Table S2. Feeding characteristics for study groups**

| Feeding information                                                                                                 |                                 | Visit     | Control group<br>(n=42) | Investigational<br>group (n=39) | Breast-fed group<br>(n=108) |
|---------------------------------------------------------------------------------------------------------------------|---------------------------------|-----------|-------------------------|---------------------------------|-----------------------------|
| Number of feeds per day<br>over the past 7 days, Mean<br>(SD)                                                       |                                 | 6 weeks   | 6.9 (2.9)               | 8.1 (2.3)                       | 9 (2.47)                    |
|                                                                                                                     |                                 | 3 months  | 5.7 (2.6)               | 6.9 (2.9)                       | 8 (2.3)                     |
|                                                                                                                     |                                 | 6 months  | 5.3 (2.1)               | 4.7 (1.9)                       | 6.6 (2.4)                   |
|                                                                                                                     |                                 | 9 months  | 5 (1.9)                 | 4.5 (1.4)                       | 5.6 (2.4)                   |
|                                                                                                                     |                                 | 12 months | 2.2 (2.1)               | 3.1 (2.3)                       | 4.4 (1.9)                   |
| Feeding mode, n (%)                                                                                                 | No response                     | 6 weeks   | 2 (5.1)                 | 3 (7.1)                         | 9 (8.3)                     |
|                                                                                                                     | On a fixed schedule             |           | 1 (2.6)                 | 4 (9.5)                         | 4 (3.7)                     |
|                                                                                                                     | On demand                       |           | 25 (64.1)               | 24 (57.1)                       | 2 (1.9)                     |
|                                                                                                                     | On demand and on a fix schedule |           | 4 (10.3)                | 4 (9.5)                         | 93 (86.1)                   |
|                                                                                                                     | No response                     | 3 months  | 6 (15.4)                | 4 (9.5)                         | 31 (28.7)                   |
|                                                                                                                     | On a fixed schedule             |           | 1 (2.6)                 | 4 (9.5)                         | 6 (5.6)                     |
|                                                                                                                     | On demand                       |           | 19 (48.7)               | 24 (57.1)                       | 3 (2.8)                     |
|                                                                                                                     | On demand and on a fix schedule |           | 6 (15.4)                | 3 (7.1)                         | 68 (63.0)                   |
|                                                                                                                     | No response                     | 6 months  | 10 (25.6)               | 9 (21.4)                        | 44 (40.7)                   |
|                                                                                                                     | On a fixed schedule             |           | 5 (12.8)                | 7 (16.7)                        | 10 (9.3)                    |
|                                                                                                                     | On demand                       |           | 13 (33.3)               | 16 (38.1)                       | 9 (8.3)                     |
|                                                                                                                     | On demand and on a fix schedule |           | 4 (10.3)                | 3 (7.1)                         | 45 (41.7)                   |
|                                                                                                                     | No response                     | 9 months  | 12 (30.8)               | 9 (21.4)                        | 59 (54.6)                   |
|                                                                                                                     | On a fixed schedule             |           | 3 (7.7)                 | 9 (21.4)                        | 7 (6.5)                     |
|                                                                                                                     | On demand                       |           | 12 (30.8)               | 12 (28.6)                       | 6 (5.6)                     |
|                                                                                                                     | On demand and on a fix schedule |           | 5 (12.8)                | 5 (11.9)                        | 36 (33.3)                   |
|                                                                                                                     | No response                     | 12 months | 13 (33.3)               | 16 (38.1)                       | 67 (62.0)                   |
|                                                                                                                     | On a fixed schedule             |           | 6 (15.4)                | 12 (28.6)                       | 10 (9.3)                    |
|                                                                                                                     | On demand                       |           | 10 (25.6)               | 5 (11.9)                        | 11 (10.2)                   |
|                                                                                                                     | On demand and on a fix schedule |           | 3 (7.7)                 | 2 (4.8)                         | 20 (18.5)                   |
| Encouragement to finish a<br>bottle (expressed milk for<br>breastfeeding group) if<br>baby stops drinking, n (%)    | No response                     | 6 weeks   | 2 (5.1)                 | 3 (7.1)                         | 104 (96.3)                  |
|                                                                                                                     | No                              |           | 20 (51.3)               | 22 (52.4)                       | 3 (2.8)                     |
|                                                                                                                     | Yes                             |           | 10 (25.6)               | 10 (23.8)                       | 1 (0.9)                     |
|                                                                                                                     | No response                     | 3 months  | 6 (15.4)                | 4 (9.5)                         | 102 (94.4)                  |
|                                                                                                                     | No                              |           | 14 (35.9)               | 22 (52.4)                       | 5 (4.6)                     |
|                                                                                                                     | Yes                             |           | 12 (30.8)               | 9 (21.4)                        | 1 (0.9)                     |
|                                                                                                                     | No response                     | 6 months  | 10 (25.6)               | 9 (21.4)                        | 102 (94.4)                  |
|                                                                                                                     | No                              |           | 13 (33.3)               | 21 (50.0)                       | 5 (4.6)                     |
|                                                                                                                     | Yes                             |           | 9 (23.1)                | 5 (11.9)                        | 1 (0.9)                     |
|                                                                                                                     | No response                     | 9 months  | 12 (30.8)               | 9 (21.4)                        | 103 (95.4)                  |
|                                                                                                                     | No                              |           | 12 (30.8)               | 20 (47.6)                       | 2 (1.9)                     |
|                                                                                                                     | Yes                             |           | 8 (20.5)                | 6 (14.3)                        | 3 (2.8)                     |
|                                                                                                                     | No response                     | 12 months | 13 (33.3)               | 16 (38.1)                       | 105 (97.2)                  |
|                                                                                                                     | No                              |           | 13 (33.3)               | 15 (35.7)                       | 2 (1.9)                     |
|                                                                                                                     | Yes                             |           | 6 (15.4)                | 4 (9.5)                         | 1 (0.9)                     |
| Number of infants with at<br>least one reported<br>interruption of study<br>product intake/<br>breastfeeding, n (%) | No response                     | 6 weeks   | 2 (5.1)                 | 3 (7.1)                         | 9 (8.3)                     |
|                                                                                                                     | No                              |           | 28 (71.8)               | 32 (76.2)                       | 98 (90.7)                   |
|                                                                                                                     | Yes                             |           | 2 (5.1)                 | 0                               | 1 (0.9)                     |
|                                                                                                                     | No response                     | 3 months  | 9 (23.1)                | 4 (9.5)                         | 30 (27.8)                   |
|                                                                                                                     | No                              |           | 21 (53.8)               | 28 (66.7)                       | 76 (70.4)                   |
|                                                                                                                     | Yes                             |           | 2 (5.1)                 | 3 (7.1)                         | 2 (1.9)                     |
|                                                                                                                     | No response                     | 6 months  | 10 (25.6)               | 8 (19)                          | 46 (42.6)                   |
|                                                                                                                     | No                              |           | 22 (56.4)               | 25 (59.5)                       | 61 (56.5)                   |
|                                                                                                                     | Yes                             |           | 0                       | 2 (4.8)                         | 1 (0.9)                     |
|                                                                                                                     | No response                     | 9 months  | 12 (30.8)               | 9 (21.4)                        | 60 (55.6)                   |
|                                                                                                                     | No                              |           | 20 (51.3)               | 26 (61.9)                       | 48 (44.4)                   |

| Feeding information                                                 |             | Visit     | Control group<br>(n=42) | Investigational<br>group (n=39) | Breast-fed group<br>(n=108) |
|---------------------------------------------------------------------|-------------|-----------|-------------------------|---------------------------------|-----------------------------|
|                                                                     | Yes         | 12 months | 0                       | 0                               | 0                           |
|                                                                     | No response |           | 17 (43.6)               | 18 (42.9)                       | 67 (62.0)                   |
|                                                                     | No          |           | 15 (38.5)               | 15 (35.7)                       | 41 (38.0)                   |
|                                                                     | Yes         |           | 0                       | 2 (4.8)                         | 9 (8.3)                     |
| Length of interruption<br>(days), Mean (SD)                         |             | 6 weeks   | 0.5 (2.0)               | 0 (0)                           | 0 (0.3)                     |
|                                                                     |             | 3 months  | 0.8 (3.3)               | 2.5 (10.9)                      | 0.1 (0.3)                   |
|                                                                     |             | 6 months  | 0 (0)                   | 2.4 (11.7)                      | 0.1 (1.0)                   |
|                                                                     |             | 9 months  | 0 (0)                   | 0 (0)                           | 0 (0)                       |
|                                                                     |             | 12 months | 0 (0)                   | 0.6 (2.0)                       | 0 (0)                       |
| Other dietary intake than<br>the assigned study<br>formula, n (%)   | Missing     | 6 weeks   | 2 (5.1)                 | 3 (7.1)                         | N/A                         |
|                                                                     | No          |           | 22 (56.4)               | 23 (54.8)                       | N/A                         |
|                                                                     | Yes         |           | 8 (20.5)                | 9 (21.4)                        | N/A                         |
|                                                                     | Missing     | 3 months  | 6 (15.4)                | 3 (7.1)                         | N/A                         |
|                                                                     | No          |           | 20 (51.3)               | 26 (61.9)                       | N/A                         |
|                                                                     | Yes         |           | 6 (15.4)                | 6 (14.3)                        | N/A                         |
|                                                                     | Missing     | 6 months  | 8 (20.5)                | 7 (16.7)                        | N/A                         |
|                                                                     | No          |           | 22 (56.4)               | 22 (52.4)                       | N/A                         |
|                                                                     | Yes         |           | 2 (5.1)                 | 6 (14.3)                        | N/A                         |
| Cumulative duration of<br>other dietary intake<br>(days), Mean (SD) |             | 6 weeks   | 7.5 (14.9)              | 7 (14.3)                        | N/A                         |
|                                                                     |             | 3 months  | 1.5 (4.1)               | 5.5 (14.5)                      | N/A                         |
|                                                                     |             | 6 months  | 7.7 (33.0)              | 19.1 (45.9)                     | N/A                         |

Note: n (%) refers the number of participants with at least one interruption, divided by the number of participants in the group, and multiplied by 100. Participants that missed the visit are not counted.

**Supplementary Table S3.** Spearman correlations between myelin, gray matter volume and social-emotional subscales of TBAQ (social fear, activity level, anger)

| Parameter 1        | Timepoint 1 | Parameter 2    | Timepoint 2 | Spearman correlation | P value | Number of pairs |
|--------------------|-------------|----------------|-------------|----------------------|---------|-----------------|
| Gray Matter Volume | 3 months    | Activity level | 18 months   | 0.005                | 0.983   | 25              |
|                    |             |                | 24 months   | -0.051               | 0.811   | 25              |
|                    |             | Anger          | 18 months   | 0.096                | 0.647   | 25              |
|                    |             |                | 24 months   | -0.169               | 0.419   | 25              |
|                    |             | Social Fear    | 18 months   | -0.002               | 0.991   | 25              |
|                    |             |                | 24 months   | 0.05                 | 0.811   | 25              |
|                    | 6 months    | Activity level | 18 months   | 0.219                | 0.382   | 18              |
|                    |             |                | 24 months   | 0.355                | 0.136   | 19              |
|                    |             | Anger          | 18 months   | 0.246                | 0.325   | 18              |
|                    |             |                | 24 months   | -0.138               | 0.573   | 19              |
|                    |             | Social Fear    | 18 months   | -0.043               | 0.864   | 18              |
|                    |             |                | 24 months   | -0.082               | 0.739   | 19              |
|                    | 12 months   | Activity level | 18 months   | 0.054                | 0.837   | 17              |
|                    |             |                | 24 months   | -0.005               | 0.985   | 15              |
|                    |             | Anger          | 18 months   | 0.103                | 0.694   | 17              |
|                    |             |                | 24 months   | 0.061                | 0.830   | 15              |
|                    |             | Social Fear    | 18 months   | 0.077                | 0.768   | 17              |
|                    |             |                | 24 months   | 0.127                | 0.651   | 15              |
|                    | 18 months   | Activity level | 18mo        | 0.206                | 0.462   | 15              |
|                    |             |                | 24mo        | 0.309                | 0.304   | 13              |
|                    |             | Anger          | 18mo        | 0.136                | 0.629   | 15              |
|                    |             |                | 24mo        | 0.044                | 0.887   | 13              |
|                    |             | Social Fear    | 18mo        | -0.58                | 0.023   | 15              |
|                    |             |                | 24mo        | -0.454               | 0.119   | 13              |
|                    | 24 months   | Activity level | 18mo        | 0.559                | 0.192   | 7               |
|                    |             |                | 24mo        | 0.679                | 0.093   | 7               |
|                    |             | Anger          | 18mo        | 0.179                | 0.702   | 7               |
|                    |             |                | 24mo        | 0.378                | 0.403   | 7               |
|                    |             | Social Fear    | 18mo        | -0.393               | 0.383   | 7               |
|                    |             |                | 24mo        | -0.179               | 0.702   | 7               |
| Whole Brain MWF    | 3 months    | Activity level | 18mo        | 0.208                | 0.379   | 20              |
|                    |             |                | 24mo        | 0.141                | 0.553   | 20              |
|                    |             | Anger          | 18mo        | 0.389                | 0.090   | 20              |
|                    |             |                | 24mo        | 0.118                | 0.620   | 20              |
|                    |             | Social Fear    | 18mo        | 0.005                | 0.985   | 20              |
|                    |             |                | 24mo        | -0.038               | 0.800   | 20              |
|                    | 6 months    | Activity level | 18mo        | 0.13                 | 0.688   | 12              |
|                    |             |                | 24mo        | -0.224               | 0.461   | 13              |
|                    |             | Anger          | 18mo        | 0.47                 | 0.123   | 12              |
|                    |             |                | 24mo        | 0.313                | 0.297   | 13              |
|                    |             | Social Fear    | 18mo        | 0.196                | 0.540   | 12              |
|                    |             |                | 24mo        | -0.407               | 0.168   | 13              |
|                    | 12 months   | Activity level | 18mo        | 0.328                | 0.354   | 10              |
|                    |             |                | 24mo        | 0.395                | 0.333   | 8               |
|                    |             | Anger          | 18mo        | 0.444                | 0.199   | 10              |
|                    |             |                | 24mo        | 0.69                 | 0.058   | 8               |
|                    |             | Social Fear    | 18mo        | 0.158                | 0.663   | 10              |
|                    |             |                | 24mo        | -0.738               | 0.037   | 8               |
|                    | 18 months   | Activity level | 18mo        | 0.442                | 0.099   | 15              |

| Parameter 1 | Timepoint 1 | Parameter 2    | Timepoint 2 | Spearman correlation | P value | Number of pairs |
|-------------|-------------|----------------|-------------|----------------------|---------|-----------------|
|             |             |                | 24mo        | 0.238                | 0.434   | 13              |
|             |             | Anger          | 18mo        | 0.403                | 0.137   | 15              |
|             |             |                | 24mo        | 0.536                | 0.059   | 13              |
|             |             | Social Fear    | 18mo        | -0.229               | 0.412   | 15              |
|             |             |                | 24mo        | -0.743               | 0.004   | 13              |
|             | 24 months   | Activity level | 18mo        | 0.539                | 0.168   | 8               |
|             |             |                | 24mo        | 0.548                | 0.160   | 8               |
|             |             | Anger          | 18mo        | 0.071                | 0.867   | 8               |
|             |             |                | 24mo        | 0.405                | 0.320   | 8               |
|             |             | Social Fear    | 18mo        | -0.635               | 0.091   | 8               |
|             |             |                | 24mo        | -0.524               | 0.183   | 8               |

**Supplementary Table S4.** Descriptive PeaPod body composition data for fat mass and fat-free mass.

| Supplementary Table S1: Descriptive data of body composition data for fat mass and fat free mass. |             |      |      |     |     |         |      |         |      |
|---------------------------------------------------------------------------------------------------|-------------|------|------|-----|-----|---------|------|---------|------|
|                                                                                                   |             | Mean |      | SD  |     | Minimum |      | Maximum |      |
| Study group                                                                                       | N available | Kg   | %    | Kg  | %   | Kg      | %    | Kg      | %    |
| Fat Mass                                                                                          |             |      |      |     |     |         |      |         |      |
| Visit 0 (2 to 5 weeks of age)                                                                     |             |      |      |     |     |         |      |         |      |
| Control group                                                                                     | 33          | 0.7  | 17.1 | 0.3 | 5.1 | 0.2     | 6.9  | 1.2     | 27.2 |
| Investigational group                                                                             | 32          | 0.8  | 17.5 | 0.3 | 5.4 | 0.2     | 4.9  | 1.5     | 31.3 |
| Breast-fed reference                                                                              | 107         | 0.7  | 17.5 | 0.2 | 4.5 | 0.1     | 3.0  | 1.5     | 28.7 |
| Visit 1 (6 weeks of age +/- 1 week)                                                               |             |      |      |     |     |         |      |         |      |
| Control group                                                                                     | 31          | 0.9  | 19.3 | 0.3 | 5.2 | 0.3     | 9.1  | 1.6     | 28.5 |
| Investigational group                                                                             | 28          | 1.0  | 21.1 | 0.3 | 3.6 | 0.6     | 14.5 | 1.7     | 28.6 |
| Breast-fed reference                                                                              | 100         | 1.0  | 19.9 | 0.3 | 4.9 | 0.2     | 4.6  | 1.7     | 31.8 |
| Visit 2 (3 months of age +/- 2 weeks)                                                             |             |      |      |     |     |         |      |         |      |
| Control group                                                                                     | 27          | 1.4  | 23.3 | 0.5 | 6.0 | 0.7     | 11.3 | 2.4     | 36.0 |
| Investigational group                                                                             | 22          | 1.5  | 24.7 | 0.4 | 5.0 | 0.9     | 16.3 | 2.2     | 32.8 |
| Breast-fed reference                                                                              | 82          | 1.4  | 24.0 | 0.5 | 5.3 | 0.1     | 13.0 | 2.4     | 35.2 |
| Visit 3 (6 months of age +/- 2 weeks)                                                             |             |      |      |     |     |         |      |         |      |
| Control group                                                                                     | 6           | 1.5  | 21.3 | 0.8 | 9.8 | 0.6     | 7.7  | 2.5     | 32.1 |
| Investigational group                                                                             | 5           | 2.0  | 29.4 | 0.4 | 4.2 | 1.4     | 23.2 | 2.4     | 34.1 |
| Breast-fed reference                                                                              | 19          | 1.6  | 24.3 | 0.4 | 5.1 | 1.0     | 15.1 | 2.6     | 32.8 |
| Fat-Free Mass                                                                                     |             |      |      |     |     |         |      |         |      |
| Visit 0 (2 to 5 weeks of age)                                                                     |             |      |      |     |     |         |      |         |      |

|                                       |             | Mean |      | SD  |     | Minimum |      | Maximum |      |
|---------------------------------------|-------------|------|------|-----|-----|---------|------|---------|------|
| Study group                           | N available | Kg   | %    | Kg  | %   | Kg      | %    | Kg      | %    |
| Control group                         | 33          | 3.5  | 82.9 | 0.4 | 5.1 | 2.6     | 72.8 | 4.3     | 93.1 |
| Investigational group                 | 32          | 3.5  | 82.5 | 0.5 | 5.4 | 2.6     | 68.7 | 4.3     | 95.1 |
| Breast-fed reference                  | 107         | 3.4  | 82.5 | 0.4 | 4.5 | 2.5     | 71.3 | 4.6     | 97.0 |
| Visit 1 (6 weeks of age +/- 1 week)   |             |      |      |     |     |         |      |         |      |
| Control group                         | 31          | 3.8  | 80.7 | 0.5 | 5.2 | 2.8     | 71.5 | 4.5     | 90.9 |
| Investigational group                 | 28          | 3.8  | 78.9 | 0.5 | 3.6 | 2.7     | 71.4 | 4.8     | 85.5 |
| Breast-fed reference                  | 100         | 3.8  | 80.1 | 0.4 | 4.9 | 3.0     | 68.2 | 5.0     | 95.4 |
| Visit 2 (3 months of age +/- 2 weeks) |             |      |      |     |     |         |      |         |      |
| Control group                         | 27          | 4.6  | 76.7 | 0.5 | 6.0 | 3.5     | 64.0 | 5.5     | 88.7 |
| Investigational group                 | 22          | 4.5  | 75.3 | 0.5 | 5.0 | 3.7     | 67.2 | 5.6     | 83.7 |
| Breast-fed reference                  | 82          | 4.4  | 76.0 | 0.5 | 5.3 | 3.5     | 64.8 | 5.7     | 87.0 |
| Visit 3 (6 months of age +/- 2 weeks) |             |      |      |     |     |         |      |         |      |
| Control group                         | 6           | 5.4  | 78.7 | 0.8 | 9.8 | 4.7     | 67.9 | 7.0     | 92.3 |
| Investigational group                 | 5           | 4.9  | 70.6 | 0.5 | 4.2 | 4.3     | 65.9 | 5.6     | 76.8 |
| Breast-fed reference                  | 19          | 5.1  | 75.7 | 0.4 | 5.1 | 4.3     | 67.2 | 5.9     | 84.9 |

**Supplementary Table S5.** Descriptive activity level data from FitBit.

| Sedentary (min/week)                   |             |        |        |       |        |        |         |         |
|----------------------------------------|-------------|--------|--------|-------|--------|--------|---------|---------|
| Study group                            | N available | Mean   | Median | SD    | Q1     | Q3     | Minimum | Maximum |
| Visit 3 (6 months of age +/- 2 weeks)  |             |        |        |       |        |        |         |         |
| Control group                          | 11          | 1392.7 | 1392.5 | 42.20 | 1363.7 | 1437.7 | 1304.3  | 1440.0  |
| Investigational group                  | 12          | 1374.8 | 1384.8 | 39.79 | 1360.2 | 1400.8 | 1301.3  | 1429.0  |
| Breast-fed reference                   | 34          | 1360.0 | 1365.8 | 52.24 | 1340.3 | 1395.0 | 1201.3  | 1434.3  |
| Visit 4 (9 months of age +/- 2 weeks)  |             |        |        |       |        |        |         |         |
| Control group                          | 10          | 1340.7 | 1354.3 | 58.68 | 1280.3 | 1365.3 | 1256.3  | 1436.3  |
| Investigational group                  | 8           | 1328.3 | 1329.5 | 55.05 | 1281.7 | 1382.7 | 1252.3  | 1386.3  |
| Breast-fed reference                   | 23          | 1366.3 | 1365.3 | 40.95 | 1334.0 | 1405.3 | 1292.3  | 1431.0  |
| Visit 5 (12 months of age +/- 2 weeks) |             |        |        |       |        |        |         |         |
| Control group                          | 10          | 1318.1 | 1317.7 | 77.24 | 1282.0 | 1366.0 | 1151.7  | 1439.3  |
| Investigational group                  | 10          | 1310.3 | 1305.5 | 53.63 | 1263.3 | 1350.7 | 1251.7  | 1394.3  |
| Breast-fed reference                   | 15          | 1314.8 | 1329.0 | 66.28 | 1265.3 | 1339.0 | 1212.7  | 1440.0  |
| Visit 6 (18 months of age +/- 3 weeks) |             |        |        |       |        |        |         |         |
| Control group                          | 9           | 1254.6 | 1243.0 | 61.99 | 1232.3 | 1244.0 | 1196.7  | 1410.0  |
| Investigational group                  | 7           | 1237.4 | 1214.7 | 60.91 | 1184.0 | 1270.0 | 1182.7  | 1349.0  |
| Breast-fed reference                   | 13          | 1249.6 | 1269.0 | 55.21 | 1207.7 | 1280.3 | 1162.7  | 1339.7  |
| Visit 7 (24 months of age +/- 4 weeks) |             |        |        |       |        |        |         |         |
| Control group                          | 7           | 1251.8 | 1258.3 | 39.07 | 1219.0 | 1269.0 | 1194.0  | 1315.7  |
| Investigational group                  | 5           | 1243.5 | 1260.7 | 56.33 | 1212.0 | 1282.7 | 1162.0  | 1300.3  |

| Sedentary (min/week)                   |             |        |        |        |        |        |         |         |
|----------------------------------------|-------------|--------|--------|--------|--------|--------|---------|---------|
| Study group                            | N available | Mean   | Median | SD     | Q1     | Q3     | Minimum | Maximum |
| Breast-fed reference                   | 6           | 1247.1 | 1235.3 | 112.76 | 1161.0 | 1292.7 | 1118.3  | 1440.0  |
| Lightly active (min/week)              |             |        |        |        |        |        |         |         |
| Visit 3 (6 months of age +/- 2 weeks)  |             |        |        |        |        |        |         |         |
| Control group                          | 11          | 42.3   | 47.5   | 35.62  | 2.3    | 62.0   | 0.0     | 116.0   |
| Investigational group                  | 12          | 63.4   | 55.2   | 39.09  | 39.2   | 71.0   | 11.0    | 138.7   |
| Breast-fed reference                   | 34          | 70.2   | 60.3   | 44.78  | 38.3   | 94.3   | 5.7     | 196.0   |
| Visit 4 (9 months of age +/- 2 weeks)  |             |        |        |        |        |        |         |         |
| Control group                          | 10          | 96.2   | 83.7   | 59.60  | 61.7   | 159.7  | 3.7     | 183.7   |
| Investigational group                  | 8           | 110.0  | 110.5  | 54.89  | 55.0   | 156.7  | 51.3    | 184.7   |
| Breast-fed reference                   | 23          | 72.7   | 74.7   | 40.95  | 34.7   | 106.0  | 9.0     | 147.7   |
| Visit 5 (12 months of age +/- 2 weeks) |             |        |        |        |        |        |         |         |
| Control group                          | 10          | 112.8  | 116.2  | 64.14  | 74.0   | 155.7  | 0.7     | 233.3   |
| Investigational group                  | 10          | 127.5  | 134.5  | 55.72  | 89.3   | 176.7  | 30.3    | 185.0   |
| Breast-fed reference                   | 15          | 122.3  | 111.0  | 63.29  | 98.0   | 171.3  | 0.0     | 222.3   |
| Visit 6 (18 months of age +/- 3 weeks) |             |        |        |        |        |        |         |         |
| Control group                          | 9           | 173.6  | 189.0  | 56.28  | 171.7  | 202.3  | 30.0    | 219.0   |
| Investigational group                  | 7           | 192.8  | 221.7  | 57.99  | 148.0  | 236.0  | 91.0    | 252.7   |
| Breast-fed reference                   | 13          | 175.8  | 167.7  | 50.66  | 138.0  | 205.7  | 100.3   | 260.0   |
| Visit 7 (24 months of age +/- 4 weeks) |             |        |        |        |        |        |         |         |
| Control group                          | 7           | 165.7  | 161.3  | 36.89  | 143.0  | 183.7  | 115.7   | 232.3   |

| Sedentary (min/week)  |             |       |        |        |       |       |         |         |
|-----------------------|-------------|-------|--------|--------|-------|-------|---------|---------|
| Study group           | N available | Mean  | Median | SD     | Q1    | Q3    | Minimum | Maximum |
| Investigational group | 5           | 189.1 | 170.0  | 52.07  | 152.0 | 225.0 | 137.7   | 261.0   |
| Breast-fed reference  | 6           | 176.6 | 186.7  | 104.32 | 137.7 | 244.7 | 0.0     | 304.0   |

**Supplementary Table S6.** Correlations between nutrient intake levels and myelin

|                                                                              | Number of pairs | Spearman Correlation coefficient | P-value |
|------------------------------------------------------------------------------|-----------------|----------------------------------|---------|
| <b>Correlations with myelin water fraction (mm<sup>3</sup>) at 6 months</b>  |                 |                                  |         |
| ARA intake (g/day) at 6 months                                               | 8               | 0.62                             | 0.102   |
| DHA intake (g/day) at 6 months                                               | 8               | 0.62                             | 0.102   |
| Folic acid intake (mcg/day) at 6 months                                      | 8               | 0.67                             | 0.071   |
| Iron intake (mg/day) at 6 months                                             | 8               | 0.76                             | 0.028   |
| Sphingomyelin intake (mg/day) at 6 months                                    | 8               | 0.62                             | 0.102   |
| Vitamin B12 intake (mcg/day) at 6 months                                     | 8               | 0.62                             | 0.102   |
| <b>Correlations with myelin water fraction (mm<sup>3</sup>) at 12 months</b> |                 |                                  |         |
| ARA intake (g/day) at 6 months                                               | 5               | 0.60                             | 0.285   |
| ARA intake (g/day) at 9 months                                               | 4               | 0.80                             | 0.200   |
| ARA intake (g/day) at 12 months                                              | 4               | 1.00                             | <0.001  |
| DHA intake (g/day) at 6 months                                               | 5               | 0.60                             | 0.285   |
| DHA intake (g/day) at 9 months                                               | 4               | 0.80                             | 0.200   |
| DHA intake (g/day) at 12 months                                              | 4               | 0.40                             | 0.600   |
| Folic acid intake (mcg/day) at 6 months                                      | 5               | 0.60                             | 0.285   |
| Folic acid intake (mcg/day) at 9 months                                      | 4               | 0.80                             | 0.200   |
| Folic acid intake (mcg/day) at 12 months                                     | 4               | 0.20                             | 0.800   |
| Iron intake (mg/day) at 6 months                                             | 5               | 0.90                             | 0.037   |
| Iron intake (mg/day) at 9 months                                             | 4               | 1.00                             | <0.001  |
| Iron intake (mg/day) at 12 months                                            | 4               | 0.40                             | 0.600   |
| Sphingomyelin intake (mg/day) at 6 months                                    | 5               | 0.60                             | 0.285   |
| Sphingomyelin intake (mg/day) at 9 months                                    | 4               | 0.80                             | 0.200   |
| Sphingomyelin intake (mg/day) at 12 months                                   | 4               | 0.80                             | 0.200   |
| Vitamin B12 intake (mcg/day) at 6 months                                     | 5               | 0.6                              | 0.285   |
| Vitamin B12 intake (mcg/day) at 9 months                                     | 4               | 0.8                              | 0.200   |
| Vitamin B12 intake (mcg/day) at 12 months                                    | 4               | 0.8                              | 0.200   |
| <b>Correlations with myelin water fraction (mm<sup>3</sup>) at 18 months</b> |                 |                                  |         |
| ARA intake (g/day) at 6 months                                               | 8               | 0.57                             | 0.139   |
| ARA intake (g/day) at 9 months                                               | 6               | 0.66                             | 0.156   |
| ARA intake (g/day) at 12 months                                              | 7               | 0.75                             | 0.052   |
| ARA intake (g/day) at 18 months                                              | 8               | 0.14                             | 0.736   |
| DHA intake (g/day) at 6 months                                               | 8               | 0.10                             | 0.823   |
| DHA intake (g/day) at 9 months                                               | 6               | 0.66                             | 0.156   |
| DHA intake (g/day) at 12 months                                              | 7               | 0.21                             | 0.645   |
| DHA intake (g/day) at 18 months                                              | 8               | 0.00                             | 1.000   |
| Folic acid intake (mcg/day) at 6 months                                      | 8               | 0.10                             | 0.823   |
| Folic acid intake (mcg/day) at 9 months                                      | 6               | 0.37                             | 0.468   |
| Folic acid intake (mcg/day) at 12 months                                     | 7               | -0.32                            | 0.482   |
| Folic acid intake (mcg/day) at 18 months                                     | 8               | -0.50                            | 0.207   |

|                                                                              | Number of pairs | Spearman Correlation coefficient | P-value |
|------------------------------------------------------------------------------|-----------------|----------------------------------|---------|
| Iron intake (mg/day) at 6 months                                             | 8               | 0.31                             | 0.456   |
| Iron intake (mg/day) at 9 months                                             | 6               | -0.20                            | 0.704   |
| Iron intake (mg/day) at 12 months                                            | 7               | -0.29                            | 0.535   |
| Iron intake (mg/day) at 18 months                                            | 8               | -0.67                            | 0.071   |
| Sphingomyelin intake (mg/day) at 6 months                                    | 8               | 0.40                             | 0.320   |
| Sphingomyelin intake (mg/day) at 9 months                                    | 6               | 0.60                             | 0.208   |
| Sphingomyelin intake (mg/day) at 12 months                                   | 7               | 0.57                             | 0.180   |
| Sphingomyelin intake (mg/day) at 18 months                                   | 8               | 0.14                             | 0.736   |
| Vitamin B12 intake (mcg/day) at 6 months                                     | 8               | 0.17                             | 0.693   |
| Vitamin B12 intake (mcg/day) at 9 months                                     | 6               | 0.37                             | 0.469   |
| Vitamin B12 intake (mcg/day) at 12 months                                    | 7               | -0.25                            | 0.589   |
| Vitamin B12 intake (mcg/day) at 18 months                                    | 8               | -0.33                            | 0.420   |
| <b>Correlations with myelin water fraction (mm<sup>3</sup>) at 24 months</b> |                 |                                  |         |
| ARA intake (g/day) at 6 months                                               | 4               | 0.80                             | 0.200   |
| ARA intake (g/day) at 9 months                                               | 4               | 0.40                             | 0.600   |
| ARA intake (g/day) at 12 months                                              | 5               | 0.20                             | 0.747   |
| ARA intake (g/day) at 18 months                                              | 4               | 0.60                             | 0.400   |
| ARA intake (g/day) at 24 months                                              | 4               | 1.00                             | <0.001  |
| DHA intake (g/day) at 6 months                                               | 4               | 0.80                             | 0.200   |
| DHA intake (g/day) at 9 months                                               | 4               | 0.40                             | 0.600   |
| DHA intake (g/day) at 12 months                                              | 5               | -0.10                            | 0.873   |
| DHA intake (g/day) at 18 months                                              | 4               | 0.80                             | 0.200   |
| DHA intake (g/day) at 24 months                                              | 4               | 1.00                             | <0.001  |
| Folic acid intake (mcg/day) at 6 months                                      | 4               | 0.80                             | 0.200   |
| Folic acid intake (mcg/day) at 9 months                                      | 4               | 0.40                             | 0.600   |
| Folic acid intake (mcg/day) at 12 months                                     | 5               | 0.00                             | 1.000   |
| Folic acid intake (mcg/day) at 18 months                                     | 4               | -0.80                            | 0.200   |
| Folic acid intake (mcg/day) at 24 months                                     | 4               | -0.40                            | 0.600   |
| Iron intake (mg/day) at 6 months                                             | 4               | 0.20                             | 0.800   |
| Iron intake (mg/day) at 9 months                                             | 4               | 0.40                             | 0.600   |
| Iron intake (mg/day) at 12 months                                            | 5               | 0.60                             | 0.285   |
| Iron intake (mg/day) at 18 months                                            | 4               | -0.80                            | 0.200   |
| Iron intake (mg/day) at 24 months                                            | 4               | 0.40                             | 0.600   |
| Sphingomyelin intake (mg/day) at 6 months                                    | 4               | 0.80                             | 0.200   |
| Sphingomyelin intake (mg/day) at 9 months                                    | 4               | 0.40                             | 0.600   |
| Sphingomyelin intake (mg/day) at 12 months                                   | 5               | -0.10                            | 0.873   |
| Sphingomyelin intake (mg/day) at 18 months                                   | 4               | 0.80                             | 0.200   |
| Sphingomyelin intake (mg/day) at 24 months                                   | 4               | 0.80                             | 0.200   |
| Vitamin B12 intake (mcg/day) at 6 months                                     | 4               | 0.80                             | 0.200   |
| Vitamin B12 intake (mcg/day) at 9 months                                     | 4               | -0.20                            | 0.800   |
| Vitamin B12 intake (mcg/day) at 12 months                                    | 5               | 0.30                             | 0.624   |
| Vitamin B12 intake (mcg/day) at 18 months                                    | 4               | 1.00                             | <0.001  |
| Vitamin B12 intake (mcg/day) at 24 months                                    | 4               | 0.40                             | 0.600   |
